# Supplementary material for: Statin use in myelodysplastic syndromes is associated with a better survival and decreased progression to leukemia
Source: PubMed Central journal article supplement — Blood Adv. 2023 Apr 14;7(15):3838–41. doi: 10.1182/bloodadvances.2023009818 (PMC10393730; doi:10.1182/bloodadvances.2023009818), 2023-04-14
Supplement: BLOODA_ADV-2023-009818-mmc1.pdf [file BLOODA_ADV-2023-009818-mmc1.pdf]

# Supplementary Appendix

Authors: Amber Afzal<sup>1</sup>, Mark A. Fiala<sup>2</sup>, Meagan A. Jacoby<sup>2</sup>, Matthew J. Walter<sup>2</sup>

Author Affiliations:

1. Department of Medicine, Division of Hematology, Washington University in St Louis
2. Department of Medicine, Division of Oncology, Washington University in St Louis

**Corresponding Author:** Amber Afzal, MD, MSCI. Assistant Professor, Division of Hematology, Department of Medicine, Washington University in St Louis, 660 S. Euclid Avenue, St. Louis, MO 63110, Phone number: 314-273-0564, email: [afzalamber@wustl.edu](mailto:afzalamber@wustl.edu)

**Supplementary Table 1: Identification of MDS, AML and Treatments**

|                                                                                                                                                                |                                                                                                                                                                                                                                                                                                                                                                                                                                                  |
|----------------------------------------------------------------------------------------------------------------------------------------------------------------|--------------------------------------------------------------------------------------------------------------------------------------------------------------------------------------------------------------------------------------------------------------------------------------------------------------------------------------------------------------------------------------------------------------------------------------------------|
| ICD-O-3 histology codes for MDS                                                                                                                                | 9980, 9982, 9983, 9985, 9986, 9987, 9989, 9991, 9992                                                                                                                                                                                                                                                                                                                                                                                             |
| ICD-O-3 histology codes for AML                                                                                                                                | 9984, 9801, 9805, 9806, 9807, 9808, 9809, 9840, 9860, 9861, 9865, 9866, 9867, 9869, 9870, 9871, 9872, 9873, 9874, 9877, 9878, 9879, 9891, 9895, 9896, 9897, 9910, 9911, 9912                                                                                                                                                                                                                                                                     |
| ICD9 codes for AML (inpatient)                                                                                                                                 | 205.0, 205.00, 205.01, 205.02, 205.30, 205.31, 205.32, 205.8, 205.80, 205.81, 205.82, 205.9, 205.90, 205.91, 205.92, 206.0, 206.00, 206.01, 206.02, 206.8, 206.80, 206.81, 206.82, 206.9, 206.90, 206.91, 206.92, 207.0, 207.00, 207.01, 207.02, 207.2, 207.20, 207.21, 207.22, 207.8, 207.80, 207.81, 207.82, 208.0, 208.00, 208.01, 208.02, 208.8, 208.80, 208.81, 208.82, 208.9, 208.90, 208.91, 208.92                                       |
| ICD10 codes for AML (inpatient)                                                                                                                                | C92.0, C92.00, C92.01, C92.02, C92.3, C92.30, C92.31, C92.32, C92.4, C92.40, C92.41, C92.42, C92.5, C92.50, C92.51, C92.52, C92.6, C92.60, C92.61, C92.62, C92.A, C92.A0, C92.A1, C92.A2, C92.Z, C92.Z0, C92.Z1, C92.Z2, C92.9, C92.90, C92.91, C92.92, C93.0, C93.00, C93.01, C93.02, C93.Z, C93.Z0, C93.Z1, C93.Z2, C93.9, C93.90, C93.91, C93.92, C94.0, C94.00, C94.01, C94.02, C94.2, C94.20, C94.21, C94.22, C94.8, C94.80, C94.81, C94.82 |
| Treatments for MDS                                                                                                                                             | Medicare Claims (Part A, B and D) for blood transfusions, erythropoietin stimulating agents, granulocyte colony-stimulating factors, lenalidomide, azacitidine, decitabine, allogeneic stem cell transplant                                                                                                                                                                                                                                      |
| Abbreviations: MDS=myelodysplastic syndromes, AML= acute myeloid leukemia, ICD= International Classification of Diseases, CPT = Current Procedural Terminology |                                                                                                                                                                                                                                                                                                                                                                                                                                                  |

| <b>Supplementary Table 2: Cause of Death<sup>1</sup></b>                           | <b>Frequency (%)<br/>N=2161<sup>2</sup></b> |
|------------------------------------------------------------------------------------|---------------------------------------------|
| Cardiovascular events (Myocardial infarction, stroke, sequelae of atherosclerosis) | 303 (14.0%)                                 |
| Hematological Malignancy                                                           | 309 (14.3%)                                 |
| Solid tumors                                                                       | 82 (3.8%)                                   |
| Unspecified Malignancy                                                             | 501 (23.2%)                                 |
| Infections                                                                         | 72 (3.3%)                                   |
| Chronic lung, liver or kidney disease                                              | 94 (4.3%)                                   |
| Diabetes mellitus                                                                  | 33 (1.5%)                                   |
| Alzheimer's disease                                                                | 17 (<1.0%)                                  |
| Accidents/Suicide                                                                  | 23 (1.0%)                                   |
| Miscellaneous Causes of Death                                                      | 160 (7.4%)                                  |
| Missing information                                                                | 567 (26.2%)                                 |

1= Data on cause of death was obtained from death certificates where attribution of death to a certain cause relies on the skill of healthcare professional filling the certificate

2= 467 alive at last follow-up

| <b>Supplementary Table 3: Multivariable Analysis for the Effect of Statins on Mortality and Progression to AML in MDS patients</b>                                                                                                                                                                                        |                                                                |                                                                         |
|---------------------------------------------------------------------------------------------------------------------------------------------------------------------------------------------------------------------------------------------------------------------------------------------------------------------------|----------------------------------------------------------------|-------------------------------------------------------------------------|
| Parameter                                                                                                                                                                                                                                                                                                                 | Adjusted Hazards Ratio for Mortality (95% Confidence Interval) | Adjusted Hazards Ratio for Progression to AML (95% Confidence Interval) |
| <b>Statin Use</b>                                                                                                                                                                                                                                                                                                         | <b>0.62 (0.45-0.87)</b>                                        | <b>0.80 (0.64-0.99)</b>                                                 |
| <b>Race</b> (Ref: Caucasian)                                                                                                                                                                                                                                                                                              |                                                                |                                                                         |
| <b>African American</b>                                                                                                                                                                                                                                                                                                   | <b>0.76 (0.63-0.91)</b>                                        | 0.87 (0.57-1.299)                                                       |
| <b>Others</b>                                                                                                                                                                                                                                                                                                             | <b>0.82 (0.68-0.99)</b>                                        | 1.01 (0.672-1.503)                                                      |
| <b>Ethnicity</b> (Ref: Not Hispanic)                                                                                                                                                                                                                                                                                      |                                                                |                                                                         |
| Hispanic                                                                                                                                                                                                                                                                                                                  | 0.91 (0.76-1.08)                                               | 0.93 (0.62-1.40)                                                        |
| <b>Gender</b> (Ref: Male)                                                                                                                                                                                                                                                                                                 |                                                                |                                                                         |
| Female                                                                                                                                                                                                                                                                                                                    | 0.92 (0.84-1.00)                                               | 1.10 (0.92-1.33)                                                        |
| <b>Urban-Rural</b> (Ref: non-Metro)                                                                                                                                                                                                                                                                                       |                                                                |                                                                         |
| Metro                                                                                                                                                                                                                                                                                                                     | 0.89 (0.79-1.01)                                               | 0.87 (0.66-1.13)                                                        |
| <b>Medicaid Enrollment</b> (Ref: not enrolled)                                                                                                                                                                                                                                                                            |                                                                |                                                                         |
| <b>Enrolled</b>                                                                                                                                                                                                                                                                                                           | <b>1.14 (1.03-1.26)</b>                                        | 0.89 (0.70-1.13)                                                        |
| <b>SMMRS Category</b><br>(Ref: SMMRS category 1)                                                                                                                                                                                                                                                                          |                                                                |                                                                         |
| <b>Category 2</b>                                                                                                                                                                                                                                                                                                         | <b>1.89 (1.67-2.14)</b>                                        | <b>1.36 (1.04-1.78)</b>                                                 |
| <b>Category 3</b>                                                                                                                                                                                                                                                                                                         | <b>2.68 (2.36-3.05)</b>                                        | <b>2.01 (1.53-2.64)</b>                                                 |
| <b>Category 4</b>                                                                                                                                                                                                                                                                                                         | <b>4.18 (3.64-4.79)</b>                                        | <b>2.38 (1.78-3.18)</b>                                                 |
| <b>MDS directed treatments*</b>                                                                                                                                                                                                                                                                                           |                                                                |                                                                         |
| <b>For lower-risk MDS</b>                                                                                                                                                                                                                                                                                                 | <b>1.27 (1.15-1.39)</b>                                        | 1.04 (0.85-1.28)                                                        |
| <b>For higher-risk MDS</b>                                                                                                                                                                                                                                                                                                | <b>1.70 (1.55-1.87)</b>                                        | <b>6.75 (5.55-8.20)</b>                                                 |
| <ul style="list-style-type: none"> <li>• Abbreviations: AML = acute myeloid leukemia, MDS= myelodysplastic syndromes, SMMRS= SEER-Medicare MDS Risk Score, *=Used as a time-dependent variable</li> <li>• Those who survived less than 3 months after MDS diagnosis were excluded to remove immortal time bias</li> </ul> |                                                                |                                                                         |

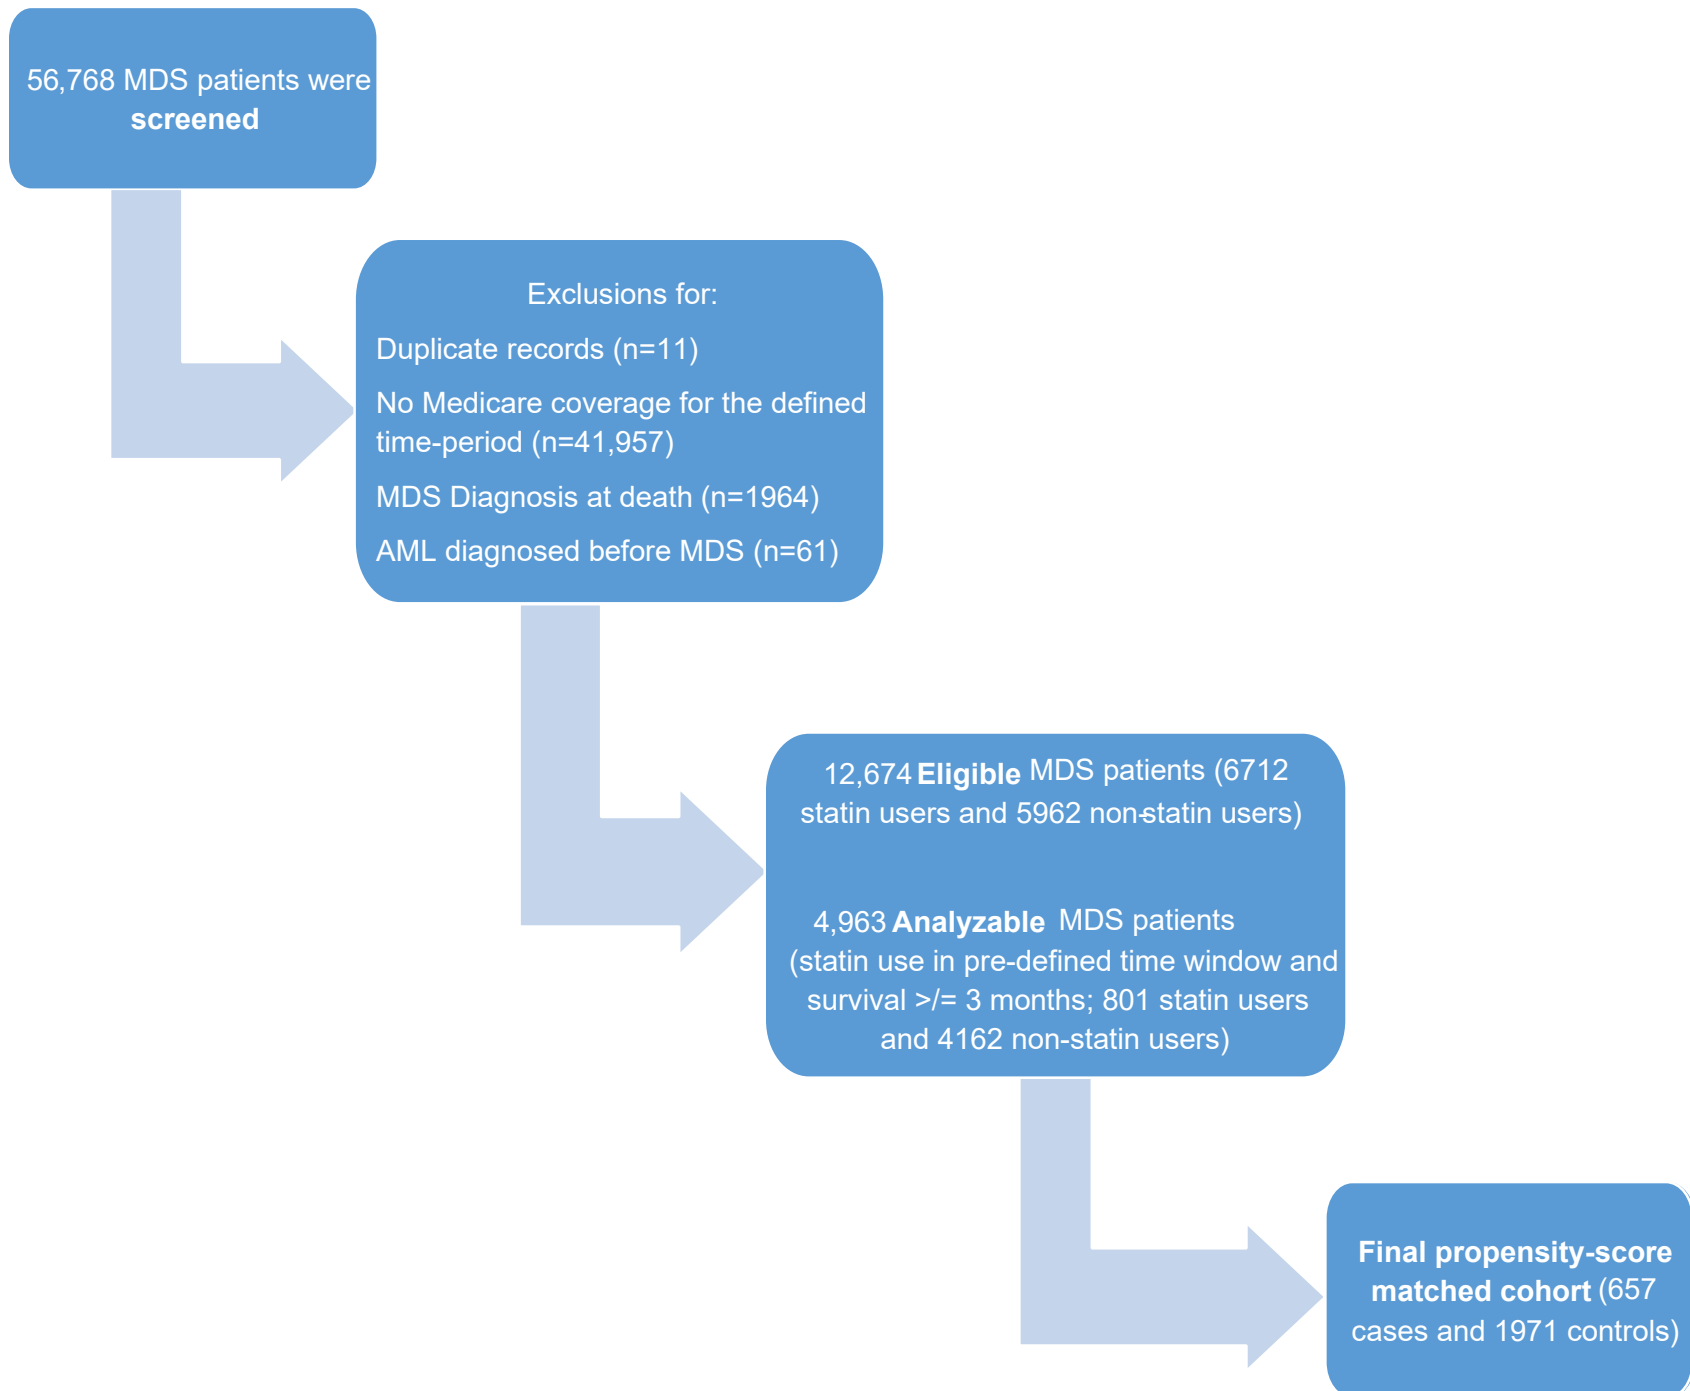

Supplementary Figure 1: CONSORT DIAGRAM
